# Supplementary material for: In search for interplay between stool microRNAs, microbiota and short chain fatty acids in Crohn’s disease - a preliminary study
Source: Springer Nature journal article supplement (doi:10.1186/s12876-020-01444-3), 2020-09-21

# Component 1

## OTU

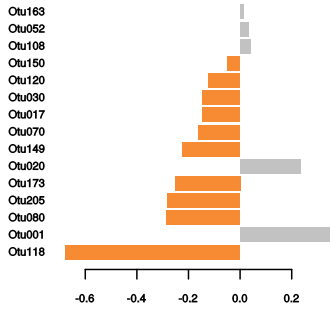

# Component 2

## OTU

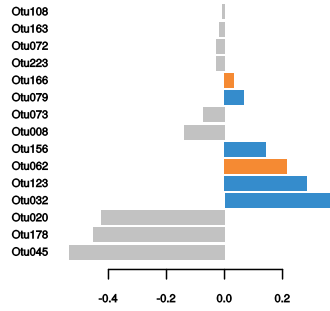

## miRNA

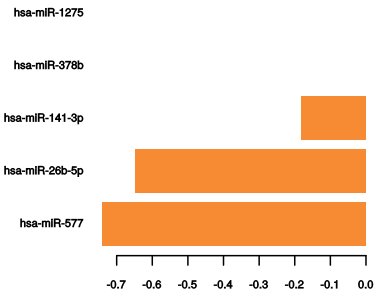

## miRNA

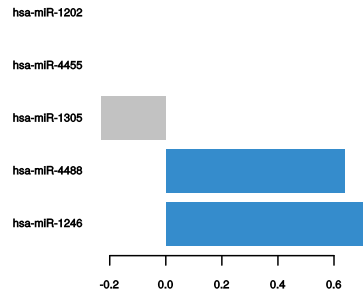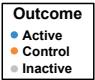

## metabolites

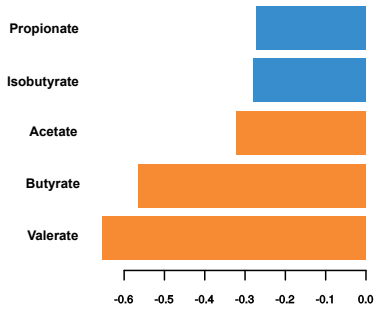

## metabolites

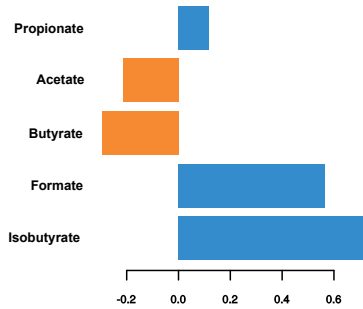

Supplement: MOESM2 [file 18400746]
